# Supplementary material for: Correlation of Global MicroRNA Expression With Basal Cell Carcinoma Subtype
Source: PubMed Central journal article supplement (PMC3284335; doi:10.1534/g3.111.001115), 2012-02-01
Supplement: supp_2.2.279_TableS1.pdf [file supp_2.2.279_TableS1.pdf]

**Table S1 Sequenced BCC Read Statistics**

|         | Lane 1     | Lane 2     | Total Reads | Reads Passing Quality Filter* | Contamination (ie adapters) | No match   | Post filter mapped | Reads mapped to known miRNAs |
|---------|------------|------------|-------------|-------------------------------|-----------------------------|------------|--------------------|------------------------------|
| Nod 1   | 8,004,773  | 8,536,662  | 16,541,435  | 13,877,215                    | 2,344,855                   | 802,777    | 10,729,583         | 4,352,584                    |
| Nod 2   | 7,971,342  | 8,927,821  | 16,899,163  | 14,602,747                    | 5,191,154                   | 988,352    | 8,423,241          | 5,812,998                    |
| Nod 3   | 7,596,811  | 11,067,243 | 18,664,054  | 17,399,390                    | 2,956,014                   | 490,981    | 13,952,395         | 3,060,949                    |
| Nod 4   | 4,221,903  | 6,699,042  | 10,920,945  | 9,761,882                     | 2,462,482                   | 1,202,086  | 6,097,314          | 3,765,975                    |
| Nod 5   | 13,589,899 |            | 13,589,899  | 12,511,028                    | 541,744                     | 500,486    | 11,468,798         | 1,896,552                    |
| Nod 6   | 11,350,436 | 12,437,593 | 23,788,029  | 18,085,699                    | 2,084,562                   | 1,840,380  | 14,160,757         | 8,935,077                    |
| Nod 7   | 3,868,235  | 5,805,924  | 9,674,159   | 6,470,845                     | 592,749                     | 431,877    | 5,446,219          | 3,376,554                    |
| Nod 8   | 4,323,916  | 7,026,830  | 11,350,746  | 8,854,620                     | 1,237,293                   | 653,873    | 6,963,454          | 2,802,179                    |
| Inf 1   | 11,244,013 | 13,670,588 | 24,914,601  | 21,628,080                    | 3880,714                    | 714,156    | 17,033,210         | 6,376,847                    |
| Inf 2   | 4,359,210  | 6,582,290  | 10,941,500  | 9,682,543                     | 2,208,253                   | 194,324    | 7,279,966          | 914,638                      |
| Inf 3   | 5,058,043  | 7,307,966  | 12,366,009  | 10,069,215                    | 4,228,105                   | 488,188    | 5,352,922          | 2,131,473                    |
| Inf 4   | 4,907,060  | 7,010,204  | 11,917,264  | 9,598,784                     | 2,488,425                   | 1,074,571  | 6,035,788          | 3,116,381                    |
| Inf 5   | 4,756,008  | 6,803,272  | 11,559,280  | 8,569,815                     | 801,131                     | 758,693    | 7,009,991          | 3,162,598                    |
| Inf 6   | 4,476,827  | 6,783,141  | 11,259,968  | 8,349,506                     | 1,073,296                   | 425,232    | 6,850,978          | 3,586,415                    |
| Inf 7   | 4,119,433  | 5,549,310  | 9,668,743   | 6,975,014                     | 619,914                     | 434,036    | 5,921,064          | 3,094,521                    |
| Inf 8   | 7,177,840  |            | 7,177,840   | 3,074,442                     | 534,580                     | 486,829    | 2,053,033          | 712,397                      |
| Totals: |            |            | 221,233,635 | 179,510,825                   | 33,245,271                  | 11,486,841 | 134,778,713        | 57,098,138                   |

\*Filter removes reads with excessive numbers of failed or ambiguous base calls.
